# Supplementary material
Source: Springer Nature journal article supplement (https://www.springermedizin.de/resource/supplementary/12936_2008_698_MOESM2_ESM.pdf/9548026)

## SNP Discovery and Selection

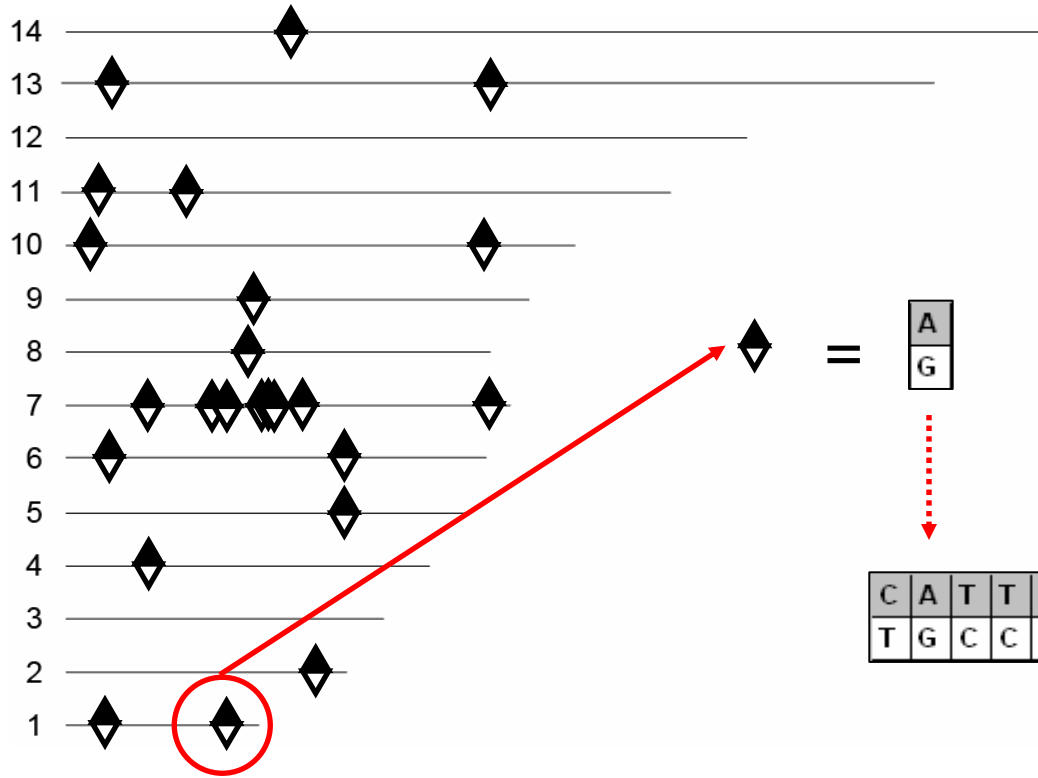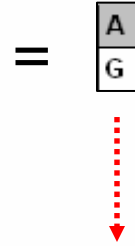

|   |   |   |   |   |   |   |   |   |   |   |   |   |   |   |   |   |   |   |   |   |   |   |   |
|---|---|---|---|---|---|---|---|---|---|---|---|---|---|---|---|---|---|---|---|---|---|---|---|
| C | A | T | T | G | C | A | A | A | C | T | A | C | A | C | C | C | A | A | G | A | C | G | G |
| T | G | C | C | C | G | G | G | T | T | C | G | T | C | A | A | T | T | C | A | C | T | T | T |

*Molecular Barcode*

## TaqMan Allelic Discrimination Assay

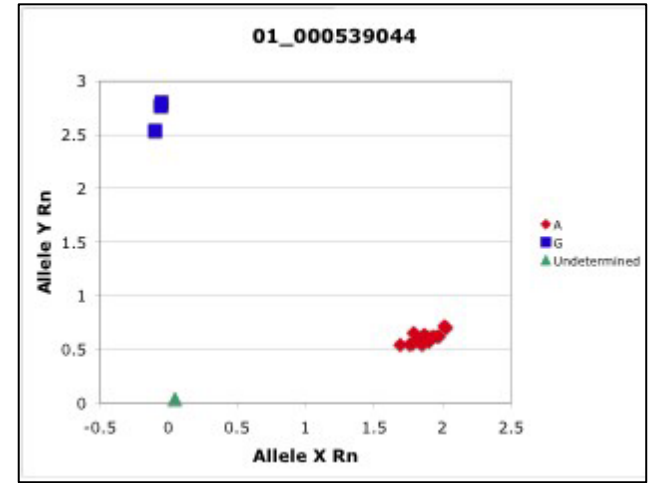

Supplement: MOESM2 [file 9548026]
